# Supplementary material for: Non-homologous end joining shapes the genomic rearrangement landscape of chromothripsis from mitotic errors
Source: PubMed Central journal article supplement — bioRxiv. 2023 Aug 11:2023.08.10.552800. Preprint. [Version 1] doi: 10.1101/2023.08.10.552800 (PMC10441393; doi:10.1101/2023.08.10.552800), 2023-08-11
Supplement: NIHPP2023.08.10.552800V1-supplement-1.pdf [file NIHPP2023.08.10.552800V1-supplement-1.pdf]

## **SUPPLEMENTARY MATERIALS**

**Supplementary Table 1. List of oligonucleotide sequences used in this study.**

**Supplementary Table 2. List of primary antibodies used in this study.**

**Supplementary Table 1. List of oligonucleotides sequences used in this study.**

| <b>Gene</b>               | <b>Sequence (5' to 3')</b> |
|---------------------------|----------------------------|
| <i>NHEJ1</i> – sgRNA 1    | ctcttaggagctgaacaag        |
| <i>NHEJ1</i> – sgRNA 2    | ggagaaggtagctcgcta         |
| <i>PRKDC</i> – sgRNA 1    | tccccctctggcatctgcg        |
| <i>PRKDC</i> – sgRNA 2    | gaaacgtccgcttatagagc       |
| <i>LIG4</i> – sgRNA 1     | agaacaccactggaactca        |
| <i>LIG4</i> – sgRNA 2     | ttgctaatttacctagaga        |
| <i>LIG4</i> – sgRNA 3     | gaaagagagagaatggccta       |
| <i>TP53BP1</i> – sgRNA 1  | cagaatcatcctctagaacc       |
| <i>TP53BP1</i> – sgRNA 2  | acgaggagacggtaatagt        |
| <i>POLQ</i> – sgRNA 1     | gtagagttcagcattcaacc       |
| <i>POLQ</i> – sgRNA 2     | ctgactccaaaagcggta         |
| <i>RAD52</i> – sgRNA 1    | gtgctacattgagggtcatc       |
| <i>RAD52</i> – sgRNA 2    | tccatcacgcagcagaatgt       |
| <i>RAD54L</i> – sgRNA 1   | gtcaccagtcggcgcatccc       |
| <i>RAD54L</i> – sgRNA 2   | gtgcaagccagaaattgaca       |
| <i>NBN</i> – sgRNA 1      | caagaagagcatgcaaccaa       |
| <i>NBN</i> – sgRNA 2      | agaatgcactcaccttgta        |
|                           |                            |
| <i>NHEJ1</i> – primer 1   | ccttcgtgtaaccagggct        |
| <i>NHEJ1</i> – primer 2   | accatccaggggtctacctca      |
| <i>PRKDC</i> – primer 1   | taaacattgctgacctctggt      |
| <i>PRKDC</i> – primer 2   | tcttccctttgtgaaagactacg    |
| <i>LIG4</i> – primer 1    | tcagacacttcaggggaattttaga  |
| <i>LIG4</i> – primer 2    | tgctcaagtgctgaactctga      |
| <i>TP53BP1</i> – primer 1 | cattccaggggagcagatgg       |
| <i>TP53BP1</i> – primer 2 | cgcagataccacagtaggctt      |
| <i>POLQ</i> – primer 1    | gttggcatgagtgtacctt        |
| <i>POLQ</i> – primer 2    | cttcaactgtagcatgggc        |
| <i>RAD52</i> – primer 1   | gtgtggtaaggaattaacacagctt  |
| <i>RAD52</i> – primer 2   | gcagcaggtctactccatcc       |
| <i>RAD54L</i> – primer 1  | aacgaggtatgggctatggg       |
| <i>RAD54L</i> – primer 2  | gccatctttgttagggctcc       |
| <i>NBN</i> – primer 1     | gccatctctgcaactctgatac     |
| <i>NBN</i> – primer 2     | tgtcataaccttctcggtgga      |
|                           |                            |
| Control – siRNA           | CUACAUCCGAUCGAUGAUdTdT     |
| <i>XLF</i> – siRNA1       | GCAUUACAGUGCCAAGUGAdTdT    |
| <i>XLF</i> – siRNA2       | CGCUGAUUCGAGAUCGAUUGAdTdT  |

**Supplementary Table 2. List of primary antibodies used in this study.**

| <b>Antibody</b>              | <b>Source</b>                             |
|------------------------------|-------------------------------------------|
| XLF                          | Cell Signaling 2854                       |
| DNA-PKcs                     | Abcam ab44815 (a gift from Benjamin Chen) |
| DNA Ligase IV                | Cell Signaling 14649                      |
| 53BP1                        | Novus NB100-304                           |
| RAD52                        | Santa Cruz sc-365341                      |
| RAD54                        | Cell Signaling 15016                      |
| NBS1                         | Cell Signaling 14956                      |
| $\alpha$ -Tubulin            | Cell Signaling 3873                       |
| Histone H2A.X (phospho S139) | Cell Signaling 2577                       |
| Histone H2A.X (phospho S139) | Millipore 05-636                          |
| FLAG                         | Sigma F1804                               |
| GFP                          | Cell Signaling 2555                       |
| mCherry                      | Cell Signaling 43590S                     |
